# Supplementary material for: Coronaviruses exploit a host cysteine-aspartic protease for efficient replication
Source: Research Square preprint supplement (doi:10.21203/rs.3.rs-354943/v1), 2021-03-26
Supplement: Supplementary file 1 [file 3f04bc3024d1d28baa47a609.docx]

**Extended Data Table 2. List of qPCR primers.**

| Species | Gene | Sequence |
| --- | --- | --- |
| SARS-CoV-2 | RdRp | (F) 5’- CGCATACAGTCTTRCAGGCT -3’  (R) 5’- GTGTGATGTTGAWATGACATGGTC -3’  Probe 5’- FAM- TTAAGATGTGGTGCTTGCATACGTAGAC-lABkFQ-3’ |
| SARS-CoV-1 | RdRp | (F) 5’- CGCATACAGTCTTRCAGGCT -3’  (R) 5’- GTGTGATGTTGAWATGACATGGTC -3’  Probe 5’-FAM- CTTCGTTGCGGTGCCTGTATTAGG-IABkFQ-3’ |
| MERS-CoV | N | (F) 5’-CAAAACCTTCCCTAAGAAGGAAAAG-3’  (R) 5’-GCTCCTTTGGAGGTTCAGACAT-3’  Probe 5’-FAM-ACAAAAGGCACCAAAAGAAGAATCAACAGACC-BHQ1-3' |
| HCoV-229E | N | (F) 5'-CGTACTCCTAAGCCTTCTCG-3'  (R) 5'-TCGACTAGGGTTAAGAAGAGG-3' |
| HCoV-OC43 | N | (F) 5'-CGATGAGGCTATTCCGACTAGGT-3'  (R) 5'-CCTTCCTGAGCCTTCAATATAGTAACC-3' |
| EV-A71 | VP1 | (F) 5'-GCCCCTGAATGCGGCTAAT-3'  (R) 5'-ATTGTCACCATAAGCAGYCA-3'  Probe 5’-FAM-CGGACACCCAAAGTAGTCGGTTCCG-lABkFQ-3' |
| H1N1 | M | (F) 5'-CTTCTAACCGAGGTCGAAACG-3'  (R) 5'-GGCATTTTGGACAAAKCGTCTA-3' |
| Human | IFIT1 | (F) 5’- AGAAGCAGGCAATCACAGAAAA -3’  (R) 5’- CTGAAACCGACCATAGTGGAAAT -3’ |
| IFIT2 | (F) 5’-CACATGGGCCGACTCTCAG -3’  (R) 5’CCACACTTTAACCGTGTCCAC -3’ |
| IFIT3 | (F) 5’-GAACATGCTGACCAAGCAGA -3’  (R) 5’CAGTTGTGTCCACCCTTCCT -3’ |
| IFITM3 | (F) 5’- ATGTCGTCTGGTCCCTGTTC -3’  (R) 5’- GTCATGAGGATGCCCAGAAT -3’ |
| IFNβ | (F) 5’- CGCCGCATTGACCATCTA -3’  (R) 5’- GACATTAGCCAGGAGGTTCT -3’ |
| TRIM22 | (F) 5’-ACTGTCTCAGGAACACCAAGGTCA -3’  (R) 5’-CCAGGTTATCCAGCACATTCACCTCA -3’ |
| 2’5’-OAS1 | (F) 5’- AGGAAAGGTGCTTCCGAGGTAG -3’  (R) 5’- GGACTGAGGAAGACAACCAGGT -3’ |
| GAPDH | (F) 5’- ATTCCACCCATGGCAAATTC -3’  (R) 5’- CGCTCCTGGAAGATGGTGAT -3’ |
| hDPP4  mice | TNFa | (F) 5’-ATAGCTCCCAGAAAAGCAAGC -3’  (R) 5’-CACCCCGAAGTTCAGTAGACA -3’ |
| IP10 | (F) 5’-ATGACGGGCCAGTGAGAATG -3’  (R) 5’-GAGGCTCTCTGCTGTCCATC -3’ |
| IL6 | (F) 5’-TGGAGTCACAGAAGGAGTGGCTAAG -3’  (R) 5’-TCTGACCACAGTGAGGAATGTCCAC -3’ |
| MCP1 | (F) 5’-GGCTCAGCCAGATGCAGTTAA -3’  (R) 5’-CCTACTCATTGGGATCATCTTGCT -3’ |
| CXCL5 | (F) 5’-CGGTTCCATCTCGCCATTCA -3’  (R) 5’-GCGGCTATGACTGAGGAAGG -3’ |
| CXCL9 | (F) 5’-GAGTGGAAGTGTGGACAGGG -3’  (R) 5’-TCAAGACGGAACTTCTGCCC -3’ |
| GAPDH | (F) 5’ CGACTTCAACAGCAACTCCCACTCTTCC -3’  (R) 5’TGGGTGGTCCAGGGTTTCTTACTCCTT -3’ |
| Hamster | TNFα | (F) 5’-CACCCACCGTCAAGGATTCA -3’  (R) 5’-TTGGCTGGGCAATGAAGAGT -3’ |
| IL6 | (F) 5’-TGTCTTCTTGGGACTGCTGC -3’  (R) 5’-CCAAACCTCCGACTTGTTGA -3’ |
| IL1β | (F) 5’-GTGGACAACAAAGCTCGTGG-3’  (R) 5’-AGCCCGTCAACCTCAAAGAA-3’ |
| IFNγ | (F) 5’-TGCATCTTGGCTTTGTTGCTC -3’  (R) 5’-TCCCCTCCATTCACGACATC -3’ |
| IP10 | (F) 5’-TACGTCGGCCTATGGCTACT -3’  (R) 5’-TTGGGGACTCTTGTCACTGG -3’ |
| CXCL3 | (F) 5’-GGTCCAAGAGTACGTCGCTG -3’  (R) 5’-GAGTTGTGGAGGTGGCAAGG -3’ |
| CXCL5 | (F) 5’-TCAGCTTGGTTTGGGAGCAA -3’  (R) 5’-TGAAGTGCTGGTTTCTTGGGT -3’ |
| β-actin | (F) 5’-ATGGCCAGGTCATCACCATTG -3’  (R) 5’-CAGGAAGGAAGGCTGGAAAAG -3’ |

­­
